# Supplementary material for: Facile Synthesis of NiCo2O4 Nanowire Arrays/Few-Layered Ti3C2-MXene Composite as Binder-Free Electrode for High-Performance Supercapacitors
Source: Molecules. 2022 Sep 30;27(19):6452. doi: 10.3390/molecules27196452 (PMC9572776; doi:10.3390/molecules27196452)
Supplement: Supplementary file 1 [file molecules-27-06452-s001.zip › molecules-1923218-supplementary.pdf]

## Supplementary Material

# **Facile Synthesis of NiCo<sub>2</sub>O<sub>4</sub> Nanowire Arrays/Few-Layered Ti<sub>3</sub>C<sub>2</sub>-MXene Composite as Binder-Free Electrode for High-Performance Supercapacitors**

Yanhua Li <sup>1,2</sup>, Shuhuan Wang <sup>1,2</sup>, Guolong Ni <sup>1,2</sup>, Qun Li <sup>1,2,\*</sup>

<sup>1</sup> School of Metallurgy and Energy, North China University of Science and Technology,

Tangshan 063210, China

<sup>2</sup> Key Laboratory of Special Metallurgy and Material Manufacture, Tangshan 063210, China

\* Corresponding author. E-mail addresses: liq@ncst.edu.cn.

## Table of Contents

1. SEM of  $\text{Ti}_3\text{AlC}_2$ , accordion-like  $\text{Ti}_3\text{C}_2$
2. XRD patterns of  $\text{Ti}_3\text{AlC}_2$ ,  $\text{Ti}_3\text{C}_2$
3. SEM of  $\text{NiCo}_2\text{O}_4/\text{Ti}_3\text{C}_2$
4. SEM of pure  $\text{NiCo}_2\text{O}_4$  powders
5. Electrochemical performances of carbon-based electrodes and metal oxides/sulfides-based electrodes and electrodes with similar morphology for supercapacitor application in a three-electrode system.
6. CV and GCD curves of AC/NF
7. CV and GCD curves of ACS at various potential windows
8. Morphology before and after 10000 cycles of  $\text{NiCo}_2\text{O}_4/\text{Ti}_3\text{C}_2$ .

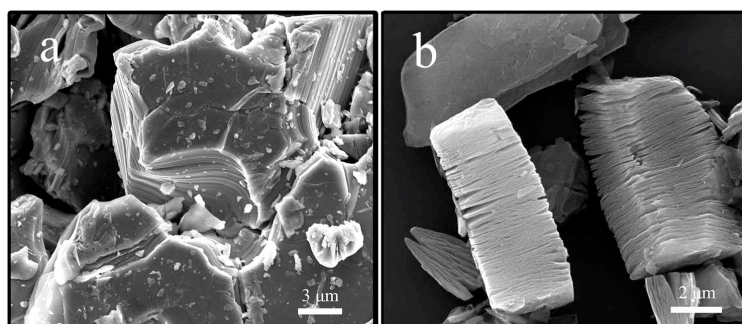

**Figure S1.** SEM images of (a)  $\text{Ti}_3\text{AlC}_2$ , (b) accordion-like  $\text{Ti}_3\text{C}_2$ .

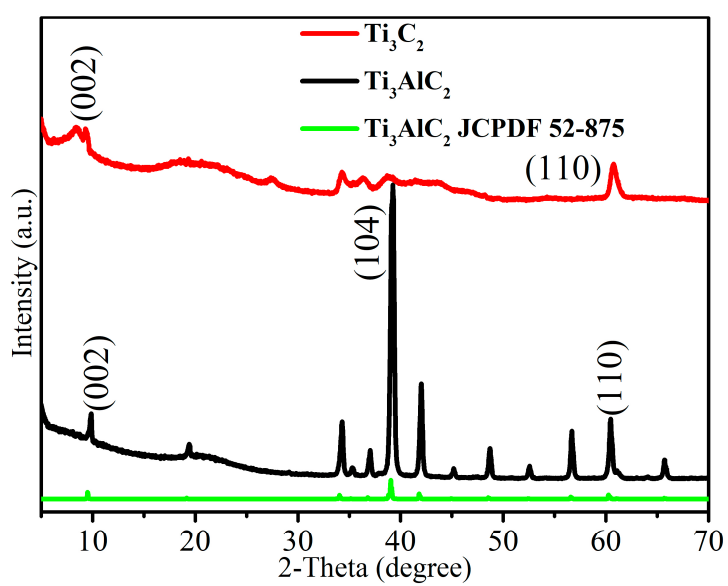

**Figure S2.** XRD patterns of  $\text{Ti}_3\text{AlC}_2$  and  $\text{Ti}_3\text{C}_2$ .

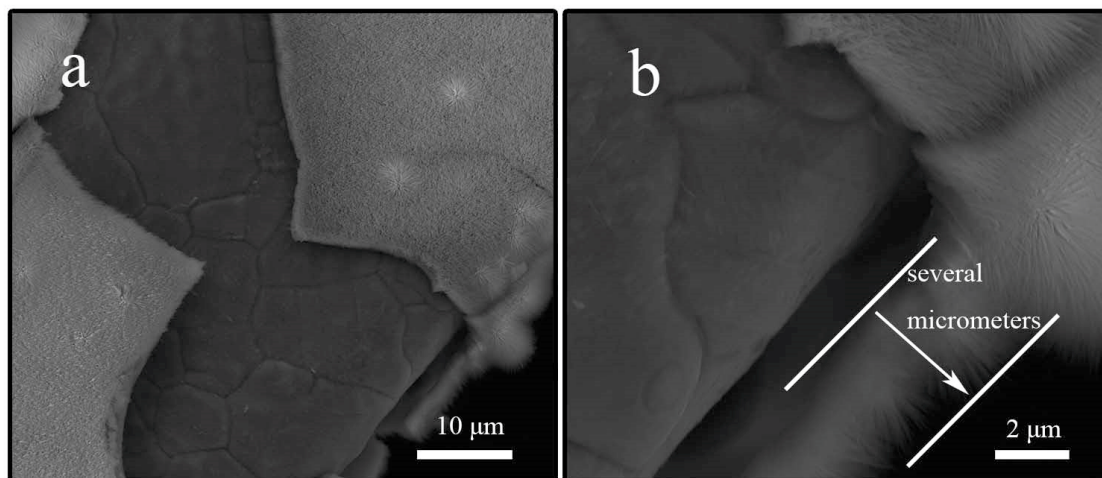

**Figure S3.** (a-b) SEM images of NiCo<sub>2</sub>O<sub>4</sub>/Ti<sub>3</sub>C<sub>2</sub>.

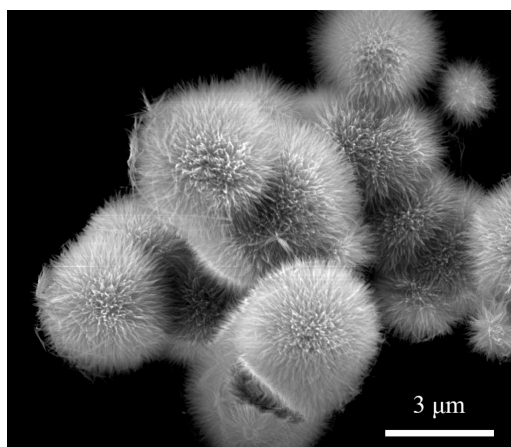

**Figure S4.** SEM image of pure NiCo<sub>2</sub>O<sub>4</sub>.

**Table S1.** Electrochemical performances of carbon based electrodes and metal oxides/sulfides based electrodes and electrodes with similar morphology for supercapacitor application in a three-electrode system.

| Electrode material                                                               | Electrolyte                                        | Potential (V) | Capacitance                                          | Rate capability                  | Ref              |
|----------------------------------------------------------------------------------|----------------------------------------------------|---------------|------------------------------------------------------|----------------------------------|------------------|
| <b>Ti<sub>3</sub>C<sub>2</sub>T<sub>x</sub>/NiCo<sub>2</sub>S<sub>4</sub>@CC</b> | 6 M KOH                                            | 0–0.7         | 2326 F g <sup>-1</sup> at 1 A g <sup>-1</sup>        | 66.3% (15 A g <sup>-1</sup> )    | [48]             |
| <b>P-Ti<sub>3</sub>C<sub>2</sub>@NiCo<sub>2</sub>S<sub>4</sub></b>               | 3 M KOH                                            | -0.1–0.4      | 973 F g <sup>-1</sup> at 1 A g <sup>-1</sup>         | –                                | [49]             |
| <b>Ti<sub>3</sub>C<sub>2</sub>/Ni-Co-Al-LDH</b>                                  | 1 M KOH                                            | -0.2–0.5      | 1990 F g <sup>-1</sup> at 1 A g <sup>-1</sup>        | –                                | [50]             |
| <b>NiCo<sub>2</sub>O<sub>4</sub>@rGO/ACF</b>                                     | 3 M KOH                                            | -0.2–0.6      | 1487 F g <sup>-1</sup> at 3 mA cm <sup>-2</sup>      | 60.45% (70 mA cm <sup>-2</sup> ) | [51]             |
| <b>NHCS/Ni<sub>2</sub>CoS<sub>4</sub></b>                                        | 2 M KOH                                            | 0–0.5         | 1465 F g <sup>-1</sup> at 0.5 A g <sup>-1</sup>      | 57.33% (8 A g <sup>-1</sup> )    | [52]             |
| <b>N/S-doped porous carbons</b>                                                  | 6 M KOH                                            | -1–0          | 318 F g <sup>-1</sup> at 0.5 A g <sup>-1</sup>       | 71.7% (30 A g <sup>-1</sup> )    | [53]             |
| <b>V/Co<sub>0.85</sub>Se</b>                                                     | 3 M KOH                                            | 0–0.6         | 1.28 mA h cm <sup>-2</sup> at 5 mA cm <sup>-2</sup>  | 60.2% (30 mA cm <sup>-2</sup> )  | [54]             |
| <b>MnO<sub>2</sub>@SrCo<sub>0.875</sub>Nb<sub>0.125</sub>O<sub>3</sub>@CC</b>    | 0.5 M MnCl <sub>2</sub> and 0.5 M KNO <sub>3</sub> | -0.4–0.6      | 2066.0 mF cm <sup>-2</sup> at 2 mA cm <sup>-2</sup>  | 59.2% (6 mA cm <sup>-2</sup> )   | [55]             |
| <b>Gd-doped CeOx/C</b>                                                           | 1M KOH                                             | 0–1           | 280 F g <sup>-1</sup> at 0.33A g <sup>-1</sup>       | –                                | [56]             |
| <b>Co<sub>3</sub>O<sub>4</sub>/CC</b>                                            | 1M NaOH                                            | 0–1           | 106 F g <sup>-1</sup> at 500 mV s <sup>-1</sup>      | –                                | [57]             |
| <b>NiCo<sub>2</sub>O<sub>4</sub>/Ti<sub>3</sub>C<sub>2</sub></b>                 | <b>6 M KOH</b>                                     | <b>0–0.6</b>  | <b>2468 F g<sup>-1</sup> at 0.5 A g<sup>-1</sup></b> | <b>72% (10 A g<sup>-1</sup>)</b> | <b>This work</b> |

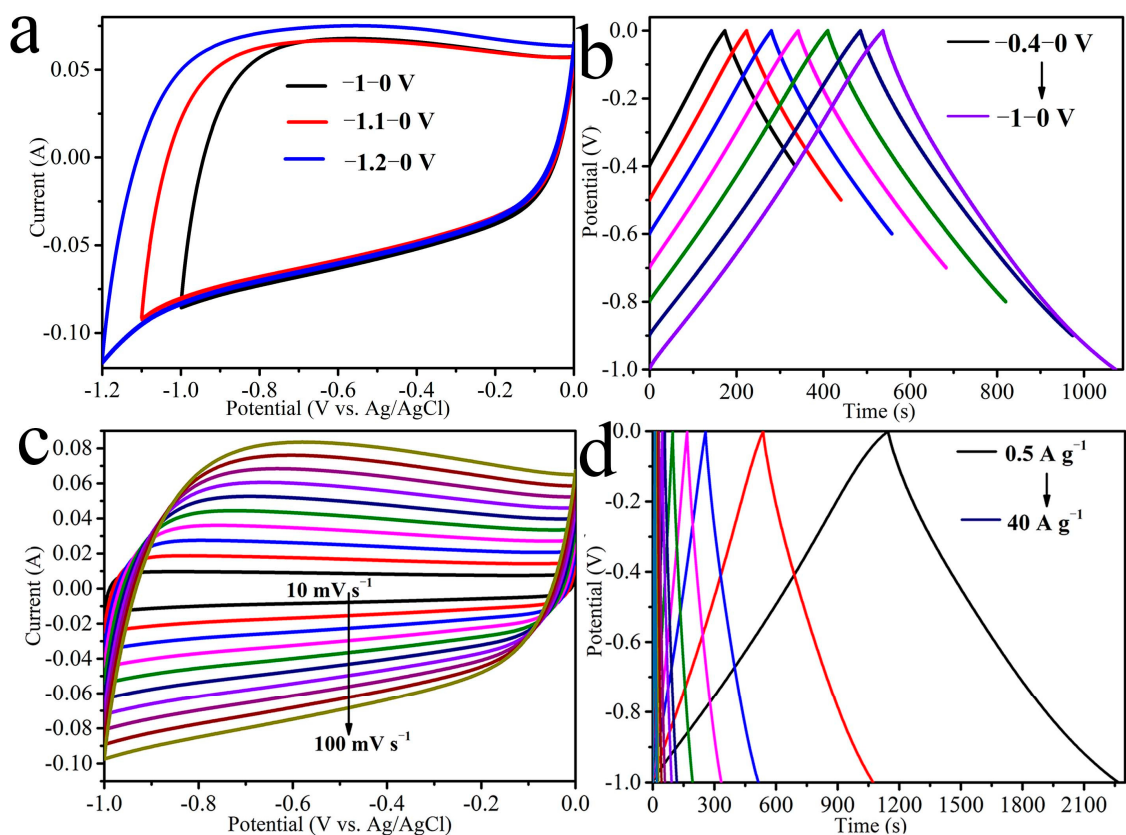

**Figure S5.** (a-b) CV and GCD curves at various potential windows, (c) CV curves at various scan rates, (d) GCD curves at various current densities of AC/NF.

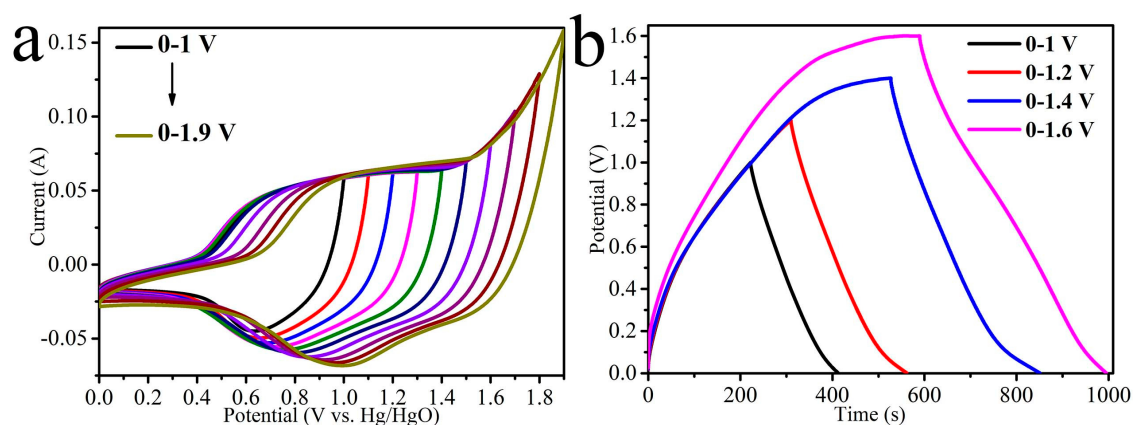

**Figure S6.** (a-b) CV and GCD curves of ACS at various potential windows.

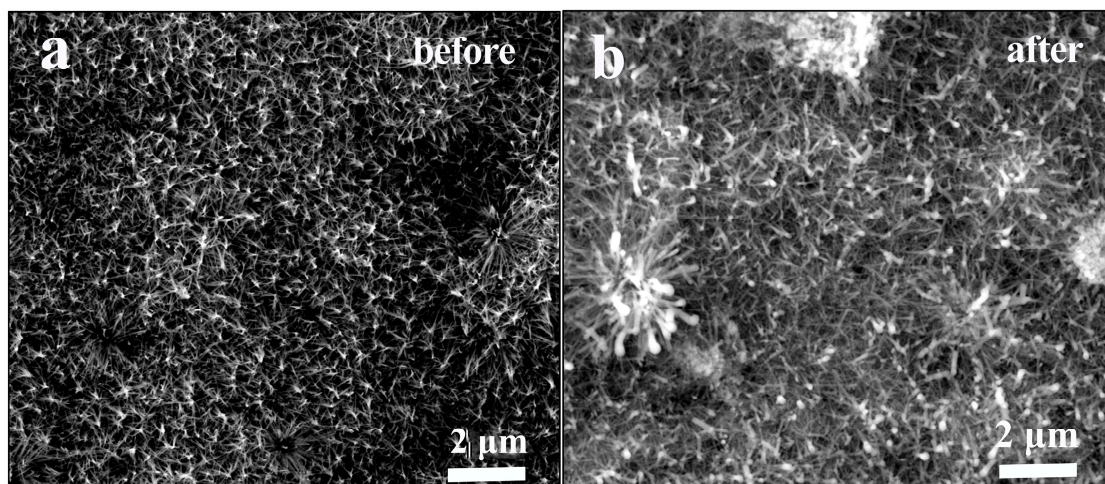

**Figure S7.** (a-b) morphology before and after 10,000 cycles of  $\text{NiCo}_2\text{O}_4/\text{Ti}_3\text{C}_2$ .
